# Supplementary material
Source: PubMed Central journal article supplement (PMC10230442)
Supplement: NIHMS1891161-supplement-Figure_S3.pdf [file NIHMS1891161-supplement-Figure_S3.pdf]

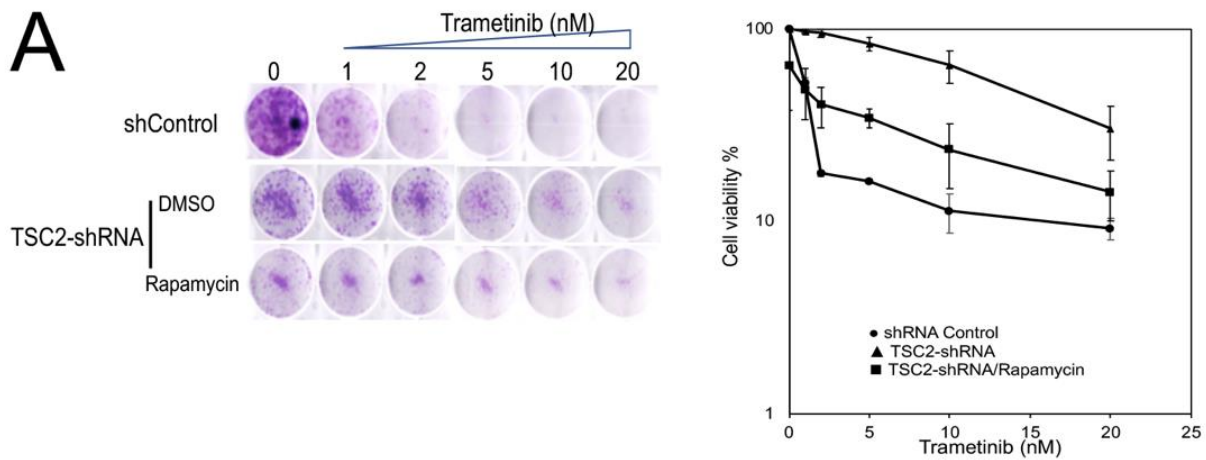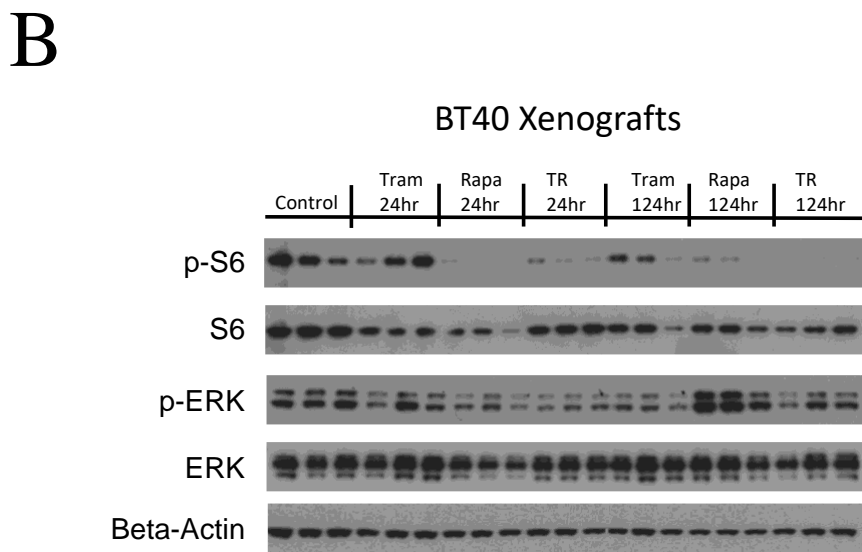

**Fig.S3A. Rapamycin partially re-sensitizes BT-40 cells when TSC2 is suppressed.** BT-40 cells were infected with lentivirus expressing TSC2 shRNA, selected in puromycin, and sensitivity to trametinib with or without rapamycin (100nM) determined by Alamar Blue staining.

**Fig.S3B. Both rapamycin and trametinib inhibit mTORC1 activity in BT-40 xenografts.** Mice bearing subcutaneous BT-40 xenografts were treated with trametinib (1 mg/kg/day) or rapamycin (5 mg/kg/day). Cohorts of tumors (n=3) were harvested 24 Hr after dose 1, or 4 Hr after daily dose 5. Both rapamycin and trametinib decreased pS6 at 24 Hr and at 124 Hr.
