# Supplementary material
Source: PubMed Central journal article supplement (PMC10230442)
Supplement: NIHMS1891161-supplement-Figure_S4.pdf [file NIHMS1891161-supplement-Figure_S4.pdf]

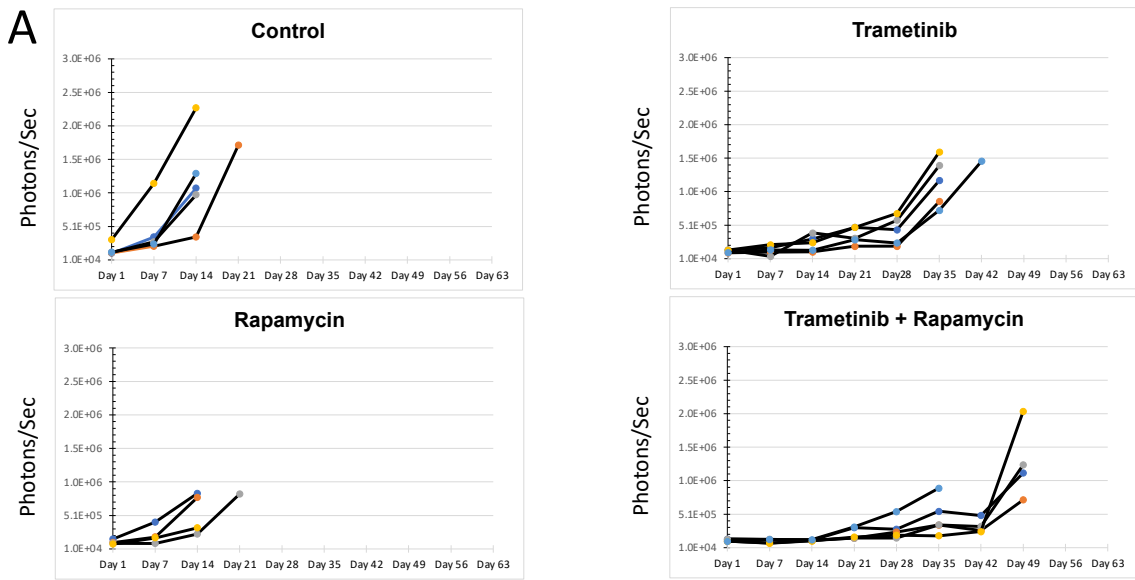

Fig.S4. The combination of trametinib + rapamycin delays regrowth after completion of treatment. Mice bearing intracranial BT-40/Luc xenografts received trametinib (1 mg/kg daily PO), rapamycin (5 mg/kg 5-days/week IP) or the combination. All treatments were for a planned 42 days. Treatment was started when the bioluminescence signal was  $> 1 \times 10^4$  photons/sec.
