# Supplementary material
Source: PubMed Central journal article supplement (PMC10230442)
Supplement: NIHMS1891161-supplement-Figure_S7.pdf [file NIHMS1891161-supplement-Figure_S7.pdf]

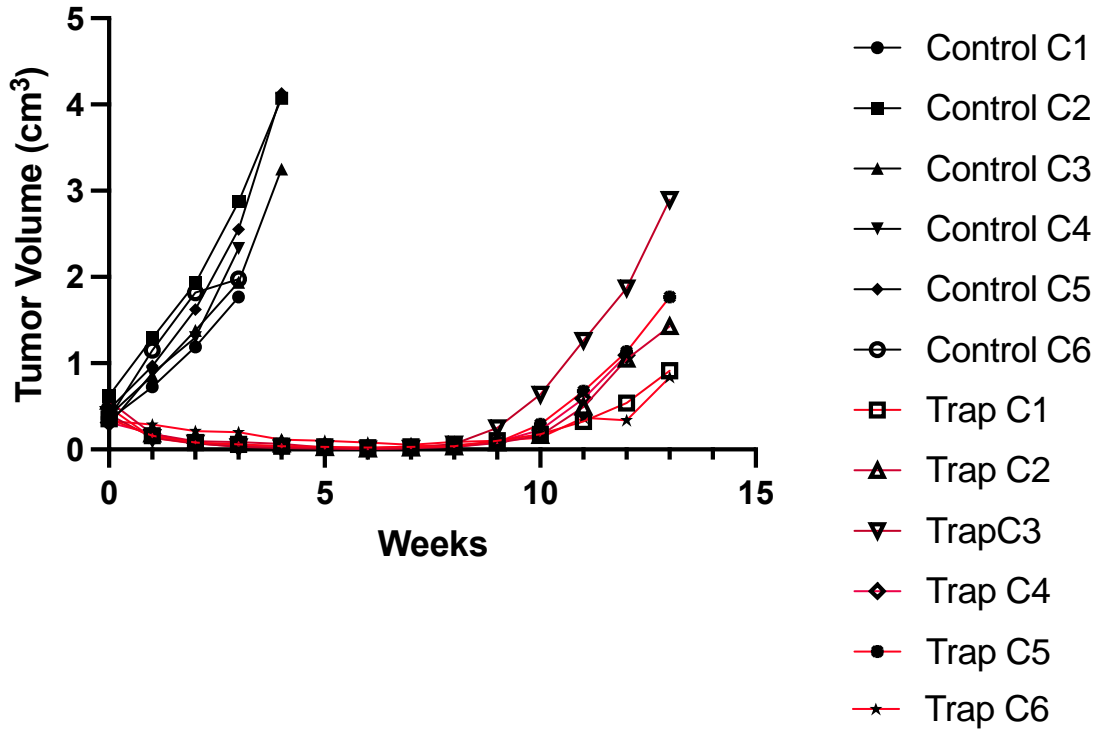

**Fig.S7. Rapamycin prevents emergence of trametinib resistance in BT-40 xenografts.** Sensitivity of BT-40 xenografts treated with trametinib + rapamycin (Trap) for 6 cycles. Curves show overlay of tumor volume (mean) with time from start of treatment for six cycles of trametinib + rapamycin therapy or control growth for each cycle of therapy. Black lines, Control tumor growth (Control C1-C6); red lines, growth of treated tumors (Trap C1-C6).
